# Supplementary material
Source: ML conference proceedings conference paper supplement (https://proceedings.neurips.cc/paper_files/paper/2022/hash/08342dc6ab69f23167b4123086ad4d38-Abstract.html)
Supplement: Supplementary file 1 [file 08342dc6ab69f23167b4123086ad4d38-Supplemental-Conference.zip]

Archive with 52 entries (47 files):
- supplement/
- __MACOSX/._supplement
- supplement/.DS_Store
- __MACOSX/supplement/._.DS_Store
- supplement/supplement.pdf
- __MACOSX/supplement/._supplement.pdf
- supplement/consistency/
- __MACOSX/supplement/._consistency
- supplement/kernel/
- __MACOSX/supplement/._kernel
- supplement/consistency/.DS_Store
- __MACOSX/supplement/consistency/._.DS_Store
- supplement/consistency/config.py
- __MACOSX/supplement/consistency/._config.py
- supplement/consistency/requirements.txt
- __MACOSX/supplement/consistency/._requirements.txt
- supplement/consistency/datasets.py
- __MACOSX/supplement/consistency/._datasets.py
- supplement/consistency/secrets_example.py
- __MACOSX/supplement/consistency/._secrets_example.py
- supplement/consistency/__init__.py
- __MACOSX/supplement/consistency/.___init__.py
- supplement/consistency/models/
- __MACOSX/supplement/consistency/._models
- supplement/consistency/README.md
- __MACOSX/supplement/consistency/._README.md
- supplement/consistency/utils.py
- __MACOSX/supplement/consistency/._utils.py
- supplement/consistency/configs/
- __MACOSX/supplement/consistency/._configs
- supplement/consistency/train.py
- __MACOSX/supplement/consistency/._train.py
- supplement/kernel/mse.py
- __MACOSX/supplement/kernel/._mse.py
- supplement/kernel/run_sphere.py
- __MACOSX/supplement/kernel/._run_sphere.py
- supplement/kernel/mse_ep.py
- __MACOSX/supplement/kernel/._mse_ep.py
- supplement/kernel/dsphere.py
- __MACOSX/supplement/kernel/._dsphere.py
- supplement/consistency/models/feed_forward.py
- __MACOSX/supplement/consistency/models/._feed_forward.py
- supplement/consistency/models/__init__.py
- __MACOSX/supplement/consistency/models/.___init__.py
- supplement/consistency/models/vit.py
- __MACOSX/supplement/consistency/models/._vit.py
- supplement/consistency/models/resnet.py
- __MACOSX/supplement/consistency/models/._resnet.py
- supplement/consistency/models/wide_resnet.py
- __MACOSX/supplement/consistency/models/._wide_resnet.py
- supplement/consistency/configs/mlp_binary_cifar10.yaml
- __MACOSX/supplement/consistency/configs/._mlp_binary_cifar10.yaml
