# Supplementary material
Source: ML conference proceedings conference paper supplement (https://proceedings.neurips.cc/paper_files/paper/2022/hash/08342dc6ab69f23167b4123086ad4d38-Abstract.html)
Supplement: Supplementary file 1 [file 08342dc6ab69f23167b4123086ad4d38-Supplemental-Conference.zip › supplement/consistency/requirements.txt]

appnope==0.1.2
backcall==0.2.0
certifi==2021.5.30
charset-normalizer==2.0.6
click==8.0.1
configparser==5.0.2
cycler==0.11.0
decorator==5.1.0
docker-pycreds==0.4.0
gitdb==4.0.7
GitPython==3.1.24
idna==3.2
ipdb==0.13.9
ipython==7.28.0
jedi==0.18.0
kiwisolver==1.3.2
matplotlib==3.4.3
matplotlib-inline==0.1.3
numpy==1.21.2
pandas==1.3.4
parso==0.8.2
pathtools==0.1.2
pexpect==4.8.0
pickleshare==0.7.5
Pillow==8.3.2
promise==2.3
prompt-toolkit==3.0.20
protobuf==3.18.0
psutil==5.8.0
ptyprocess==0.7.0
Pygments==2.10.0
pyparsing==3.0.4
python-dateutil==2.8.2
pytz==2021.3
PyYAML==5.4.1
requests==2.26.0
sentry-sdk==1.4.3
shortuuid==1.0.1
six==1.16.0
smmap==4.0.0
subprocess32==3.5.4
termcolor==1.1.0
toml==0.10.2
torch==1.9.1
torchvision==0.10.1
traitlets==5.1.0
typing-extensions==3.10.0.2
urllib3==1.26.7
wandb==0.12.4
wcwidth==0.2.5
yacs==0.1.8
yaspin==2.1.0
