# Supplementary material
Source: ML conference proceedings conference paper supplement (https://proceedings.neurips.cc/paper_files/paper/2022/hash/08342dc6ab69f23167b4123086ad4d38-Abstract.html)
Supplement: Supplementary file 1 [file 08342dc6ab69f23167b4123086ad4d38-Supplemental-Conference.zip › supplement/consistency/secrets_example.py]

## Secret stuff that shouldn't be checked in:
# duplicate this file here and rename it secrets.py
WANDB_API_KEY = 'your-api-key-here' 
