# Supplementary material
Source: ML conference proceedings conference paper supplement (https://proceedings.neurips.cc/paper_files/paper/2022/hash/08342dc6ab69f23167b4123086ad4d38-Abstract.html)
Supplement: Supplementary file 1 [file 08342dc6ab69f23167b4123086ad4d38-Supplemental-Conference.zip › supplement/kernel/mse_ep.py]

from dsphere import load_sphere 
import kernel
import torch
import numpy as np
import csv
from datetime import datetime


import kernel
import eigenpro
import numpy as np
import ipdb


import argparse
parser = argparse.ArgumentParser()

parser.add_argument('--kernel_type', type=str, nargs='+')
parser.add_argument('--ridge', type=float)


time_stamp = datetime.today().strftime('%Y-%m-%d-%H:%M') 


def run_mse(dims,bandwidth,n_power=14,repeat=1,ridge=0,kernel_type="Gaussian"):
    ##### Model 
    if kernel_type == "Gaussian":
        kernel_fn  = lambda x,y: kernel.gaussian(x, y, bandwidth=bandwidth)
    elif kernel_type == "Laplacian":
        kernel_fn = lambda x,y: kernel.laplacian(x, y, bandwidth=bandwidth)


    mse_test_gaussian = []
    mse_test_laplacian = []

    ns = [2**i for i in range(14,n_power)]
    use_cuda = torch.cuda.is_available()
    device = torch.device("cuda" if use_cuda else "cpu")


    results_fp = open(f'{time_stamp}-dimension={dims[0]}_sphere_{kernel_type}_ridge{ridge}_EP.csv', 'w')    
    results_writer = csv.writer(results_fp, delimiter=',', quotechar='"')
    results_writer.writerow(["Kernel Type", "kernel_bandwidth","ridge","train_n","val_mse","dimension"])
    results_fp.flush()
    for d in dims:
        print(f'dimension={d}')
        for s_ind,s in enumerate(ns):
            print(f'number of traiing samples={s}')
            loss = 0
            for r in range(repeat):
                x_train, y_train, x_test, y_test = load_sphere(s,d)
                x_train = torch.tensor(x_train)
                x_test = torch.tensor(x_test)

                Kxx_train = kernel_fn(x_train,x_train)
                Kxx_test = kernel_fn(x_test,x_train)
    
                model = eigenpro.FKR_EigenPro(kernel_fn, x_train, 1, device=device)
                res,alpha_eigp = model.fit(x_train, y_train, x_test, y_test,cutoff=1*10**-3, epochs=[1, 2, 5,100], mem_gb=12,weight_decay = ridge)
                loss_tmp = torch.sum( torch.pow( Kxx_test@alpha_eigp.cpu().data - y_test , 2) )/y_test.shape[0]
                results_writer.writerow([kernel_type,bandwidth,ridge,y_train.shape[0],loss_tmp.item(),d])
                results_fp.flush()
                with torch.no_grad():
                    torch.cuda.empty_cache()
                del model,x_train, y_train, x_test, y_test,Kxx_train,Kxx_test
                
if __name__ == "__main__":
    
    args = parser.parse_args()
    bandwidth = 5
    dims = [64]
    run_mse(dims,bandwidth,n_power=None,repeat=20,kernel_type=args.kernel_type[0])
    
    
    
    
    
    
                
